# Supplementary material
Source: PubMed Central journal article supplement (PMC3221596)

## Supporting information

For

### Revisiting the Armed-Disarmed Concept: The Importance of Anomeric Configuration in the Activation of S-Benzoxazolyl

#### Glycosides

David Crich\* and Ming Li

*Department of Chemistry, University of Illinois at Chicago, 845 West Taylor Street,  
Chicago, Illinois 60607-7061*

#### Table of Contents

| Compound                                                                                                                                                                                  | Expect. | Spectra          |
|-------------------------------------------------------------------------------------------------------------------------------------------------------------------------------------------|---------|------------------|
| <b>2-(2'-<i>O</i>-benzyl-3',4',6'-tri-<i>O</i>-benzoyl-1-thio-<math>\alpha</math>-D-glucopyranosyl)-benzoxazole (11)</b>                                                                  | S2      | S5<br>S6<br>S13  |
| <b>2-(2',3',4',6'-tetra-<i>O</i>-benzoyl-1-thio-<math>\alpha</math>-D-glucopyranosyl)-benzoxazole (13)</b>                                                                                | S2      | S7<br>S8<br>S13  |
| <b>3-(2',3',4',6'-tetra-<i>O</i>-benzoyl-<math>\alpha</math>-D-glucopyranosyl)-2-thiocarbonyl-benzoxazole (14)</b>                                                                        | S2      | S9<br>S10<br>S13 |
| <b>6-<i>O</i>-(2'-<i>O</i>-benzyl-3',4',6'-tri-<i>O</i>-Benzoyl-<math>\alpha</math>-D-glucopyranosyl)-1,2:3,4-di-<i>O</i>-isopropylidene-<math>\alpha</math>-D-galactopyranoside (17)</b> | S4      | S11<br>S12       |

## 2-(2'-*O*-benzyl-3',4',6'-tri-*O*-benzoyl-1-thio- $\alpha$ -D-glucopyranosyl)-benzoxazole (11)

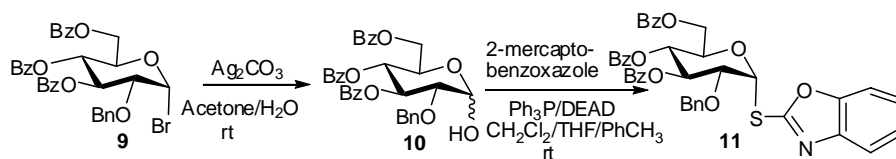

To a solution of glucosyl bromide **9**<sup>1</sup> (462 mg, 0.72 mmol) in a mixture of acetone (10 mL) and H<sub>2</sub>O (1 mL) was added Ag<sub>2</sub>CO<sub>3</sub> (400 mg, 1.45 mmol, 2.0 eq.). After the resulting mixture was stirred overnight with the exclusion of light, the reaction was diluted with CH<sub>2</sub>Cl<sub>2</sub> and filtered off the solid through a pad of Celite. The filtrate was concentrated in vacuum. The residue was coevaporated with toluene three times (5 mL  $\times$  3) to afford hemiacetal **10** (360 mg, 0.62 mmol, 86%) as a white foam, which was directly taken into next step reaction.

To a solution of hemiacetal **10** (512.7 mg, 0.88 mmol) and 2-mercaptobenzoxazole (178.6 mg, 1.18 mmol, 1.3 eq.) in a mixture of 6 mL of CH<sub>2</sub>Cl<sub>2</sub> and 2 mL of THF were sequentially added Ph<sub>3</sub>P (346 mg, 1.32 mmol, 1.5 eq.) and a solution of 40% of DEAD in toluene (0.64 ml, 1.40 mmol, 1.6 eq.). The reaction was stirred for 12 hours at ambient temperature under argon atmosphere. The volatiles were removed under reduced pressure and the residue was purified three times by silica gel column (AcOEt/Hexane = 1/4, then AcOEt/CH<sub>2</sub>Cl<sub>2</sub>/Hexane = 1/12/12, finally AcOEt/PhCH<sub>3</sub> = 1/15) to afford the desired compound (312 mg, 0.44 mmol, 50%). UV  $\lambda$  (nm) 232, 277, 284. [ $\alpha$ ]<sub>D</sub><sup>17</sup> = 208.9 (*c* 1.0, CHCl<sub>3</sub>), <sup>1</sup>H NMR  $\delta$  7.96 (d, 2H, *J* = 10), 7.94 (d, 2H, *J* = 8.5), 7.74 (d, 2H, *J* = 7.5), 7.64 (d, 1H, *J* = 7.0), 7.56 – 7.09 (m, 17H), 6.76 (d, 1H, *J* = 5.5), 5.85 (dd, 1H, *J*<sub>1</sub> = *J*<sub>2</sub> = 9.5), 5.55 (dd, 1H, *J*<sub>1</sub> = *J*<sub>2</sub> = 9.5), 4.78 (d, 2H, *J* = 12), 4.64 (d, 1H, *J* = 11), 4.48 – 4.42 (m, 2H), 4.25 (dd, 1H, *J* = 5.5, 9.5). <sup>13</sup>C NMR  $\delta$  166.0, 165.6, 165.3, 161.4, 151.9, 141.7, 136.4, 133.6, 133.4, 132.9, 130.0, 129.9, 129.5, 129.4, 129.2, 128.7, 128.6, 128.5, 128.4, 128.3, 128.2, 128.1, 124.6, 119.2, 110.2, 85.4, 75.3, 72.5, 72.1, 70.4, 69.1, 63.0. IR (film):  $\nu$  1727, 1452, 1267, 1094, 1069, 1027 cm<sup>-1</sup>. HR-ESI *m/z* [M+H]<sup>+</sup> calcd for C<sub>41</sub>H<sub>34</sub>NO<sub>9</sub>S 716.1949, found 716.1946.

## 2-(2',3',4',6'-tetra-*O*-benzoyl-1-thio-D-glucopyranosyl)-benzoxazole (13 and 4) and 2-thioxo-3-(2',3',4',6'-tetra-*O*-benzoyl- $\alpha$ -D-glucopyranosyl)-benzoxazole (14)

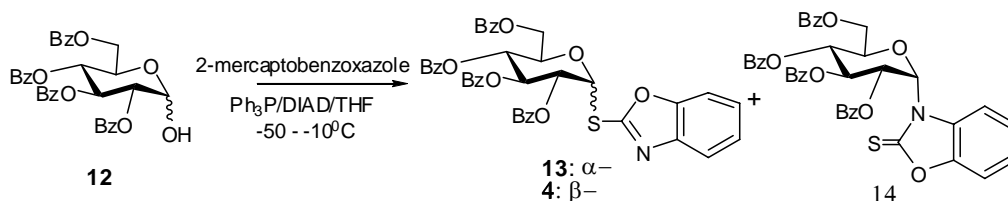

To a solution of Ph<sub>3</sub>P (345 mg, 1.32 mmol, 1.3 eq.) in anhydrous THF (7.5 mL) at -50 °C under an argon atmosphere was added DIAD (0.27 mL, 1.39 mmol, 1.4 eq.). The mixture was stirred at this temperature for 10 minutes, whereon a thick yellow precipitate formed. 2,3,4,6-tetra-*O*-benzoyl-D-glucopyranose **12**<sup>2</sup> (597 mg, 1.0 mmol)

was added and the stirring continued at  $-50\text{ }^{\circ}\text{C}$  for a further 10 minutes before a solution of 2-mercaptobenzoxazole (200 mg, 1.32 mmol, 1.3 eq.) in 3 mL of THF was slowly added over 15 minutes. Then the reaction was warmed slowly to  $-10\text{ }^{\circ}\text{C}$  over 2 hours and continued to stir for another 12 hours. TLC showed that the reaction went to completion. The solvent was removed and the residue was sequentially subjected to silica gel column (AcOEt/Hexane/ $\text{CH}_2\text{Cl}_2 = 1/20/20$ ) and normal phase HPLC (AcOEt/Hexane = 1/9 – 1/3) to furnish **13** (252 mg, 0.35 mmol, 35%) UV  $\lambda$  (nm) 232, 277, 284.  $[\alpha]_{\text{D}}^{17} = 132.2$  (*c* 0.9,  $\text{CHCl}_3$ ),  $^1\text{H NMR } \delta$  7.98 (d, 2H,  $J = 7.5$ ), 7.95 (d, 2H,  $J = 7.5$ ), 7.90 (d, 2H,  $J = 7.5$ ), 7.82 (d, 2H,  $J = 7.5$ ), 7.60 – 7.26 (m, 14H), 7.17 (t, 2H,  $J = 7.5$ ), 7.02 (d, 1H,  $J = 5.5$ ), 6.09 (dd, 1H,  $J_1 = J_2 = 10$ ), 5.81 – 5.76 (m, 2H), 4.88 – 4.86 (m, 1H), 4.55 (d, 1H,  $J = 10$ ), 4.50 (dd, 1H,  $J = 5.5, 12$ ).  $^{13}\text{C NMR } \delta$  166.0, 165.6, 165.2, 165.1, 160.0, 151.9, 141.6, 133.8, 133.7, 133.5, 133.0, 130.1, 130.0, 129.8, 129.6, 129.4, 128.7, 128.6, 128.5, 128.4, 128.3, 128.2, 124.7, 124.6, 119.3, 110.2, 84.1, 70.8, 70.7, 70.6, 68.9, 62.7. IR (film):  $\nu$  1728, 1452, 1267, 1092, 1069, 1026, 708  $\text{cm}^{-1}$ . HR-ESI  $m/z$   $[\text{M}+\text{H}]^+$  calcd for  $\text{C}_{41}\text{H}_{31}\text{NO}_{10}\text{S}$  730.1741, found 730.1739. And **4** (210 mg, 0.29 mmol, 29%). And **14** (94 mg, 0.13 mmol, 13%) UV  $\lambda$  (nm) 232, 297.  $[\alpha]_{\text{D}}^{19} = 96.0$  (*c* 0.8,  $\text{CHCl}_3$ ),  $^1\text{H NMR } \delta$  8.19 (d, 2H,  $J = 7.0$ ), 8.01 (d, 2H,  $J = 7.0$ ), 7.97 (d, 2H,  $J = 7.5$ ), 7.77 – 7.74 (m, 3H), 7.67 – 7.64 (m, 1H), 7.56 – 7.49 (m, 5H), 7.41 – 7.38 (m, 2H), 7.28 – 7.22 (m, 5H), 7.18 (d, 1H,  $J = 1.5$ ), 7.10 (t, 1H,  $J = 7.5$ ), 7.04 (t, 1H,  $J = 7.5$ ), 5.94 – 5.92 (m, 2H), 5.57 (brs, 1H), 5.11 – 5.06 (m, 2H), 4.75 – 4.72 (m, 1H).  $^{13}\text{C NMR } \delta$  178.5, 166.0, 165.2, 165.0, 164.3, 147.1, 134.1, 133.7, 133.6, 133.4, 130.6, 130.2, 130.0, 129.9, 129.2, 128.9, 128.5, 128.4, 128.3, 124.4, 124.2, 113.5, 110.3, 80.8, 76.0, 68.4, 67.0, 66.4, 61.1. IR (film):  $\nu$  1726, 1356, 1261, 1089, 1068, 1026  $\text{cm}^{-1}$ . Anal. calcd for  $\text{C}_{41}\text{H}_{31}\text{NO}_{10}\text{S}$  C, 67.48, H, 4.28, N, 1.92; Found C, 67.18, H, 4.38, N, 1.97.

### General $\text{Cu}(\text{OTf})_2$ -promoted glycosylation procedure

1,2:3,4-di-*O*-isopropylidene- $\alpha$ -D-galactopyranoside (0.1 mmol) and thioglycoside (0.12 mmol) were coevaporated with toluene three times (3 mL  $\times$  3). The residue was dissolved in 2 mL of anhydrous  $\text{CH}_2\text{Cl}_2$  and stirred for 1 hour at ambient temperature in the presence of 5Å molecular sieves (350 mg). At this point  $\text{Cu}(\text{OTf})_2$  (0.24 mmol) was added in one portion. The mixture continued to stir for 2-14 hours. The reaction was diluted with  $\text{CH}_2\text{Cl}_2$ , and the solid was filtered off. The filtrate was sequentially washed with sat. aqueous  $\text{NaHCO}_3$  and brine. The collected organic layers were dried over  $\text{Na}_2\text{SO}_4$ , filtered, concentrated. The residue was subjected to silica gel column to afford the corresponding glycoside.

**6-*O*-(2'-*O*-benzyl-3',4',6'-tri-*O*-Benzoyl- $\alpha$ -D-glucopyranosyl)-1,2:3,4-di-*O*-isopropylidene- $\alpha$ -D-galactopyranoside (17)**

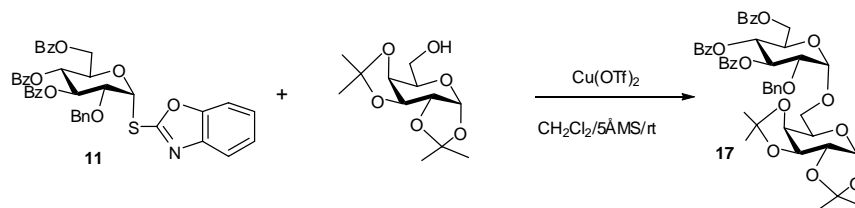

$[\alpha]_D^{22} = 13.0$  ( $c$  0.6,  $\text{CHCl}_3$ ),  $^1\text{H NMR } \delta$  8.02 – 7.90 (m, 6H), 7.53 – 7.47 (m, 3H), 7.41 – 7.32 (m, 6H), 7.22 – 7.18 (m, 5H), 5.97 (dd, 1H,  $J_1 = J_2 = 10$ ), 5.53 (d, 1H,  $J = 5.0$ ), 5.49 (t, 1H,  $J = 10$ ), 5.10 (d, 1H,  $J = 3.5$ ), 4.67 (d, 1H,  $J = 12.5$ ), 4.62 – 4.58 (m, 2H), 4.52 – 4.48 (m, 2H), 4.42 (dd, 1H,  $J = 5.0, 12.5$ ), 4.38 (dd, 1H,  $J = 1.5, 7.5$ ), 4.33 (dd, 1H,  $J = 2.5, 5.0$ ), 4.14 (t, 1H,  $J = 7.0$ ), 3.91 (dd, 1H,  $J = 6.5, 10.5$ ), 3.85 (dd, 1H,  $J = 7.0, 10.5$ ), 3.76 (dd, 1H,  $J = 3.5, 9.5$ ), 1.62 (s, 3H), 1.45 (s, 3H), 1.33 (s, 3H), 1.31 (s, 3H).  $^{13}\text{C NMR } \delta$  166.3, 165.8, 165.4, 137.6, 133.3, 133.0, 129.9, 129.8, 129.1, 128.4, 128.3, 127.9, 127.7, 109.2, 108.8, 97.1, 96.4, 72.2, 72.0, 70.8, 70.6, 69.7, 67.7, 67.5, 66.4, 63.2, 26.2, 26.1, 25.0, 24.6. HR-ESI  $m/z$   $[\text{M}+\text{H}]^+$  calcd for  $\text{C}_{46}\text{H}_{38}\text{O}_{14}$  847.2937, found 824.2926.

## References

1. Lichtenthaler F. W.; Köhler B. *Carbohydr. Res.* **1994**, 258, 77-85.
2. Sebesan S.; Neira S. *Carbohydr. Res.* **1992**, 223, 169-185.

**2-(2'-O-benzyl-3',4',6'-tri-O-benzoyl-1-thio- $\alpha$ -D-glucopyranosyl)-benzoxazole (11)**

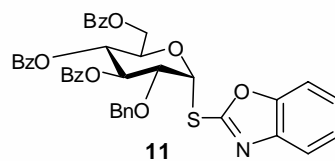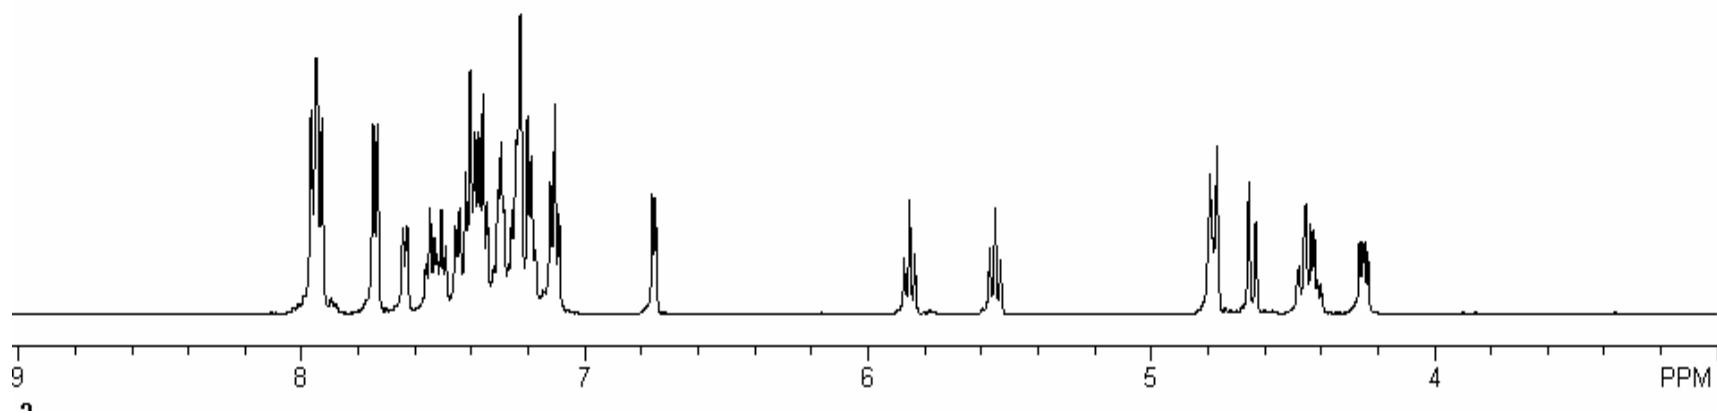

2-(2'-O-benzyl-3',4',6'-tri-O-benzoyl-1-thio- $\alpha$ -D-glucopyranosyl)-benzoxazole (11)

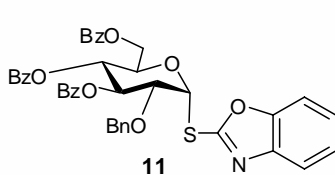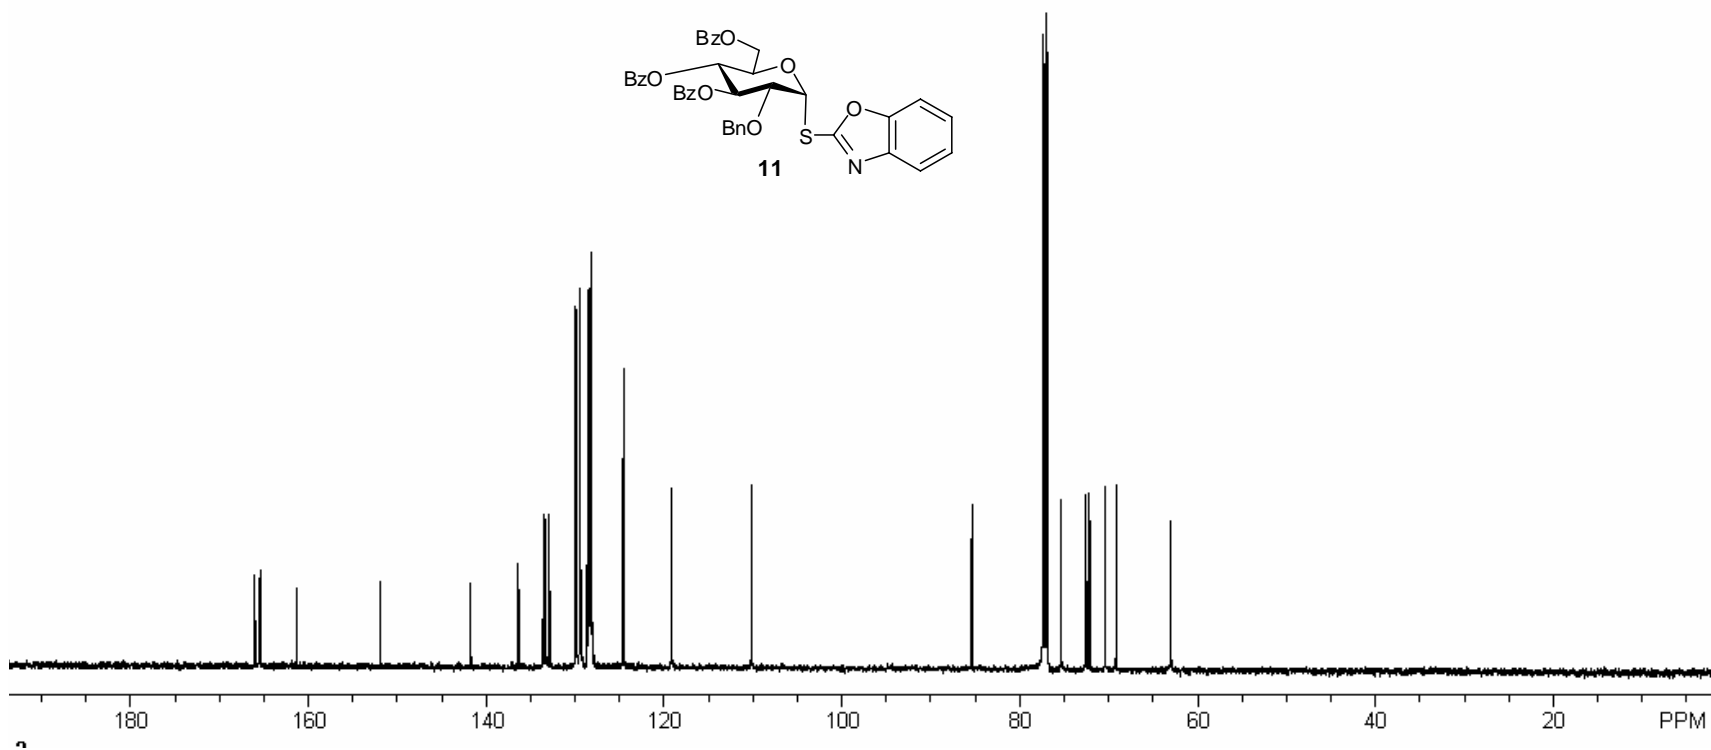

2-(2',3',4',6'-tetra-*O*-benzoyl-1-thio- $\alpha$ -D-glucopyranosyl)-benzoxazole (13)

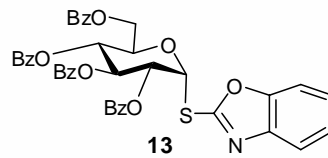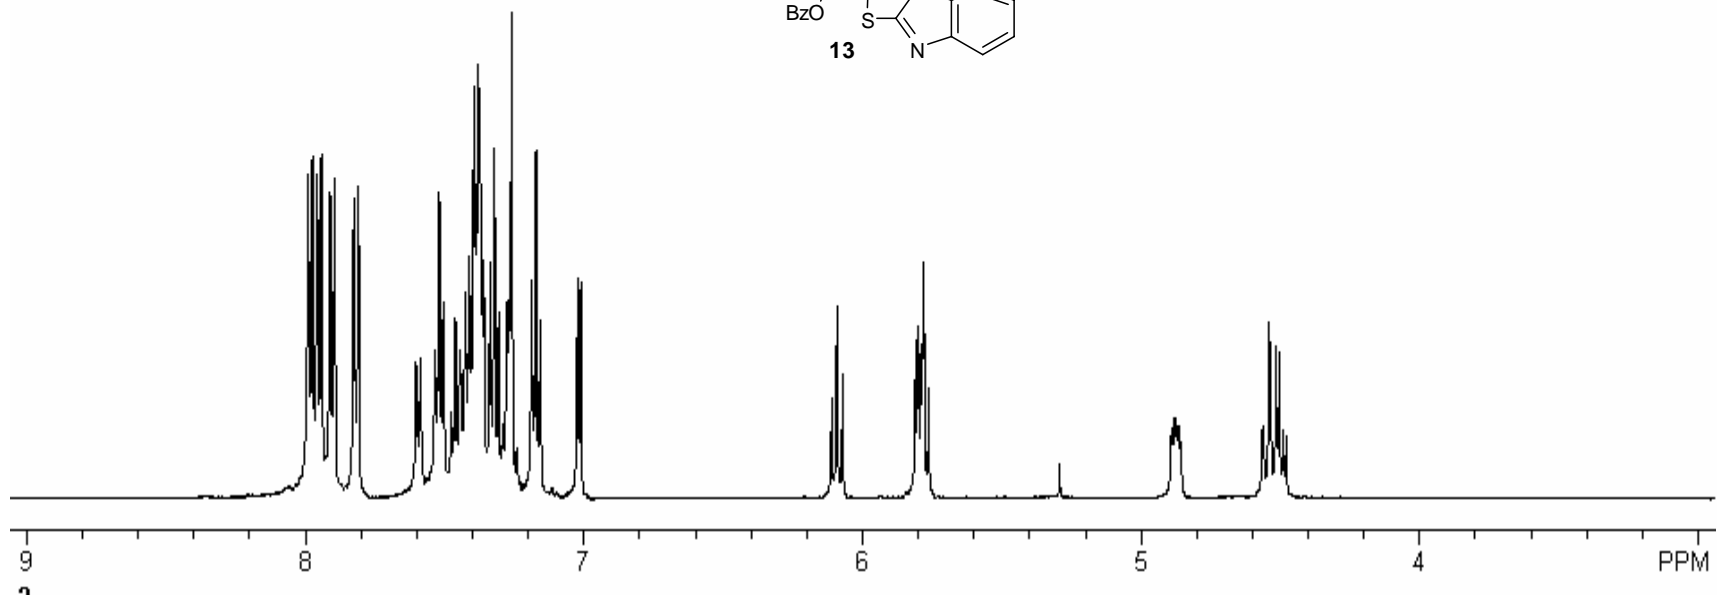

2-(2',3',4',6'-tetra-*O*-benzoyl-1-thio- $\alpha$ -D-glucopyranosyl)-benzoxazole (13)

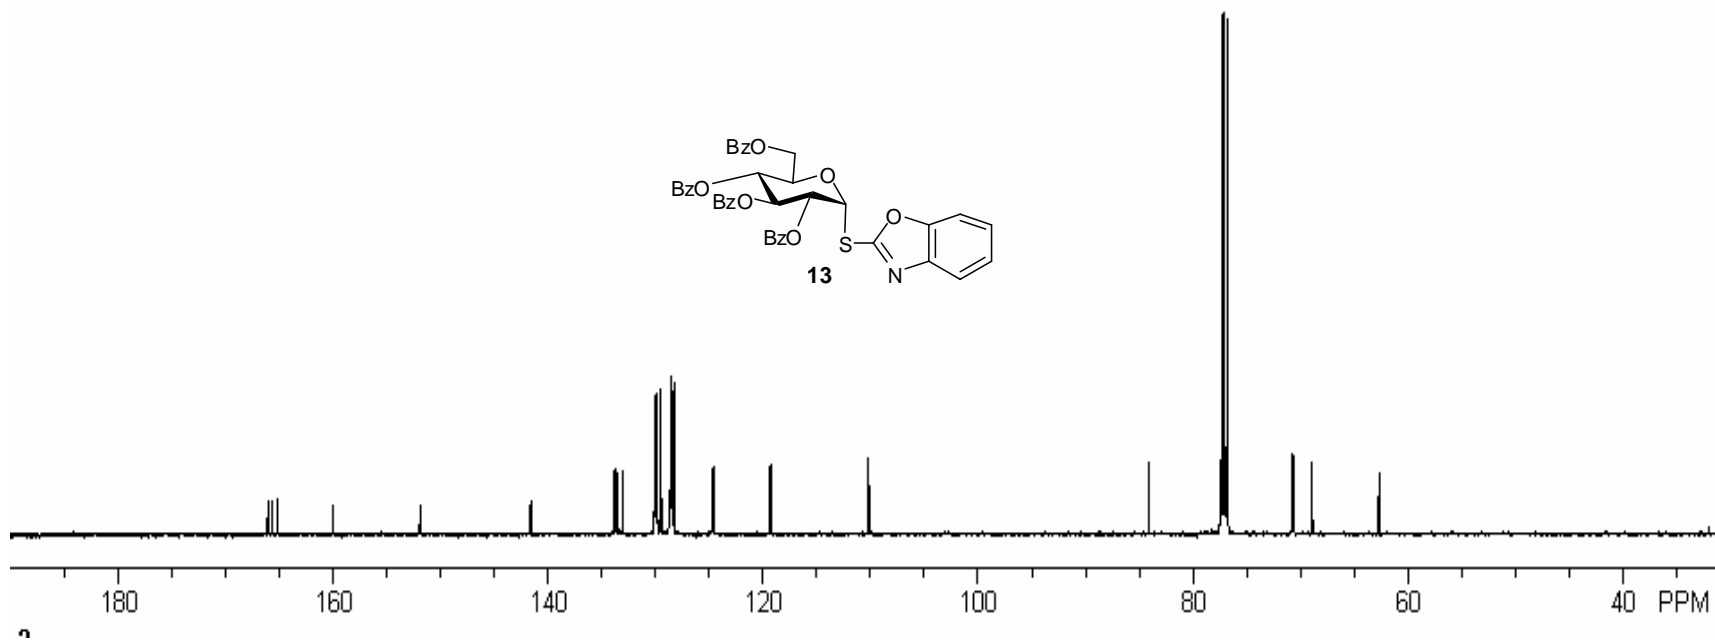



**2-thioxo- 3-(2',3',4',6'-tetra-*O*-benzoyl- $\alpha$ -D-glucopyranosyl)-benzoxazole (14)**

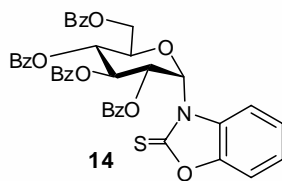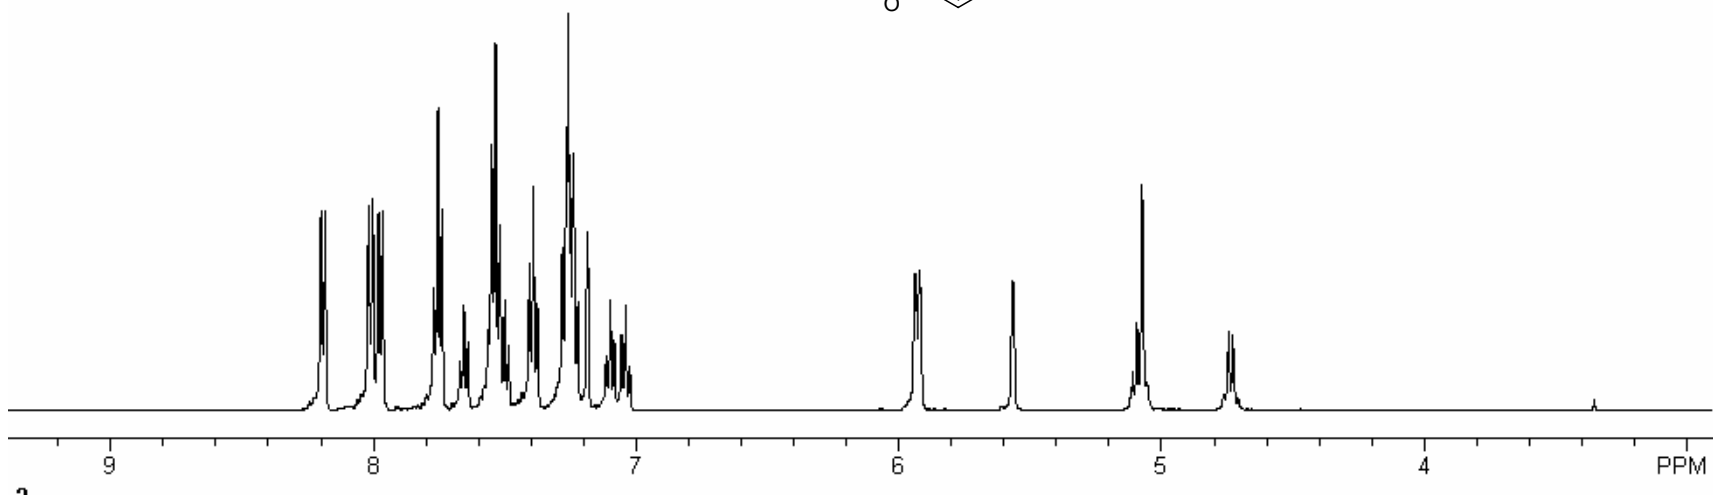

**2-thioxo- 3-(2',3',4',6'-tetra-*O*-benzoyl- $\alpha$ -D-glucopyranosyl)-benzoxazole (14)**

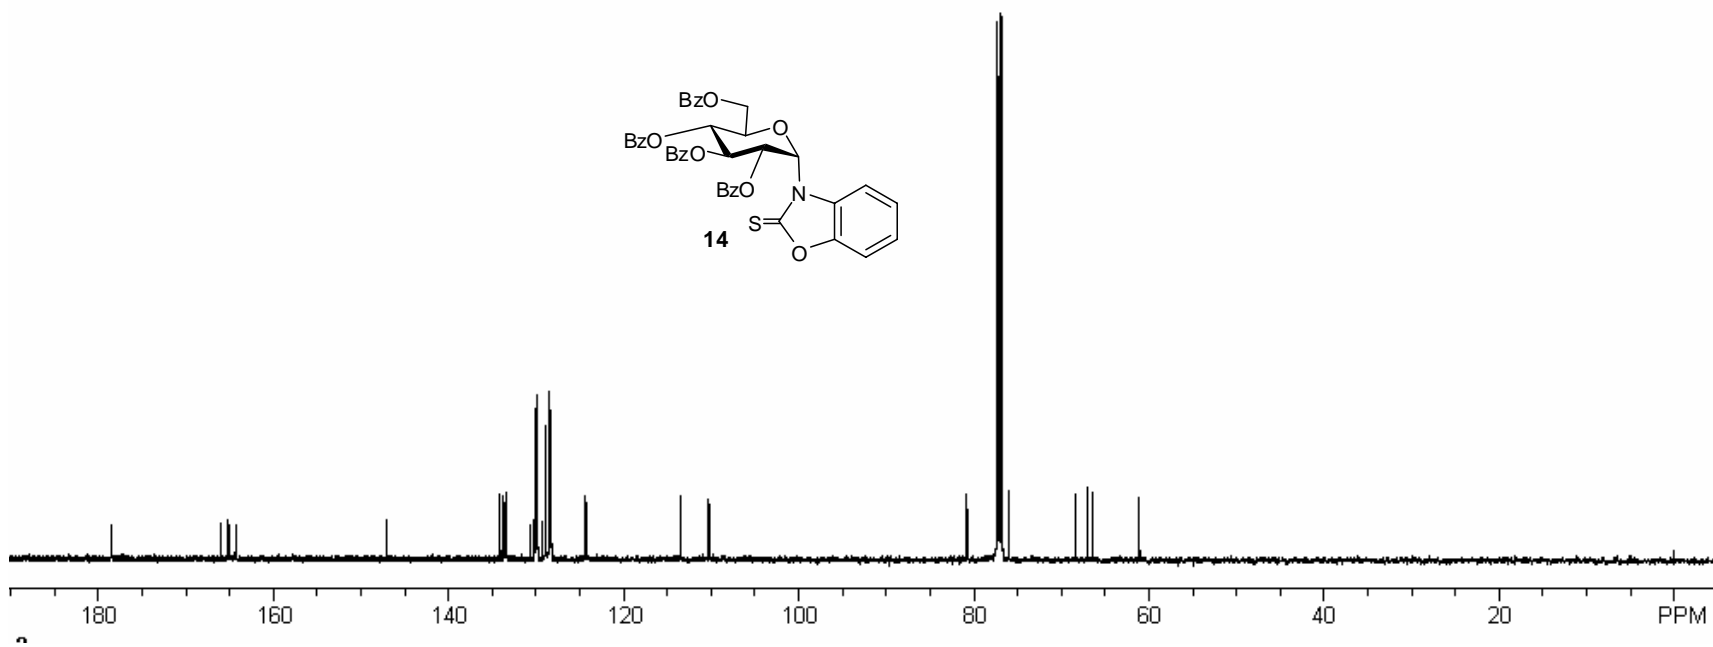

6-O-(2'-O-benzyl-3',4',6'-tri-O-Benzoyl- $\alpha$ -D-glucopyranosyl)-1,2:3,4-di-O-isopropylidene- $\alpha$ -D-galactopyranoside (17)

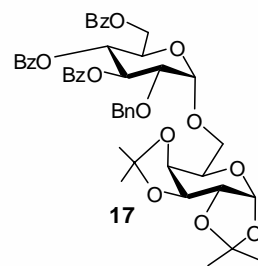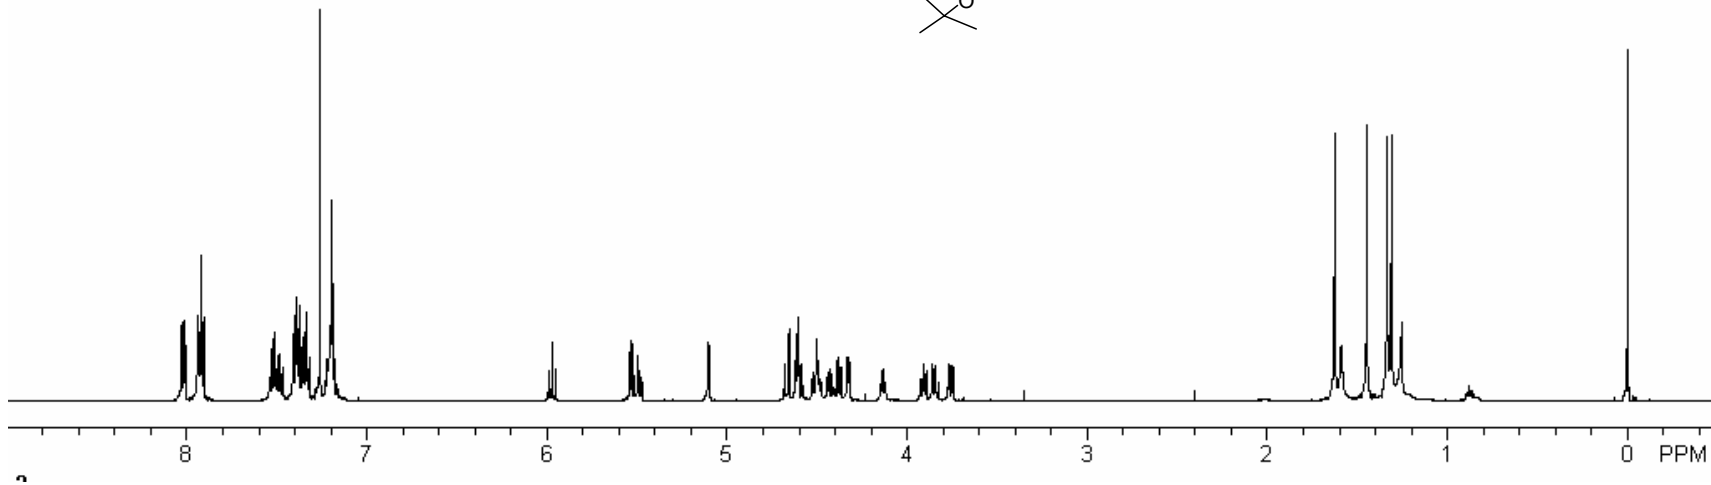

6-O-(2'-O-benzyl-3',4',6'-tri-O-Benzoyl- $\alpha$ -D-glucopyranosyl)-1,2:3,4-di-O-isopropylidene- $\alpha$ -D-galactopyranoside (17)

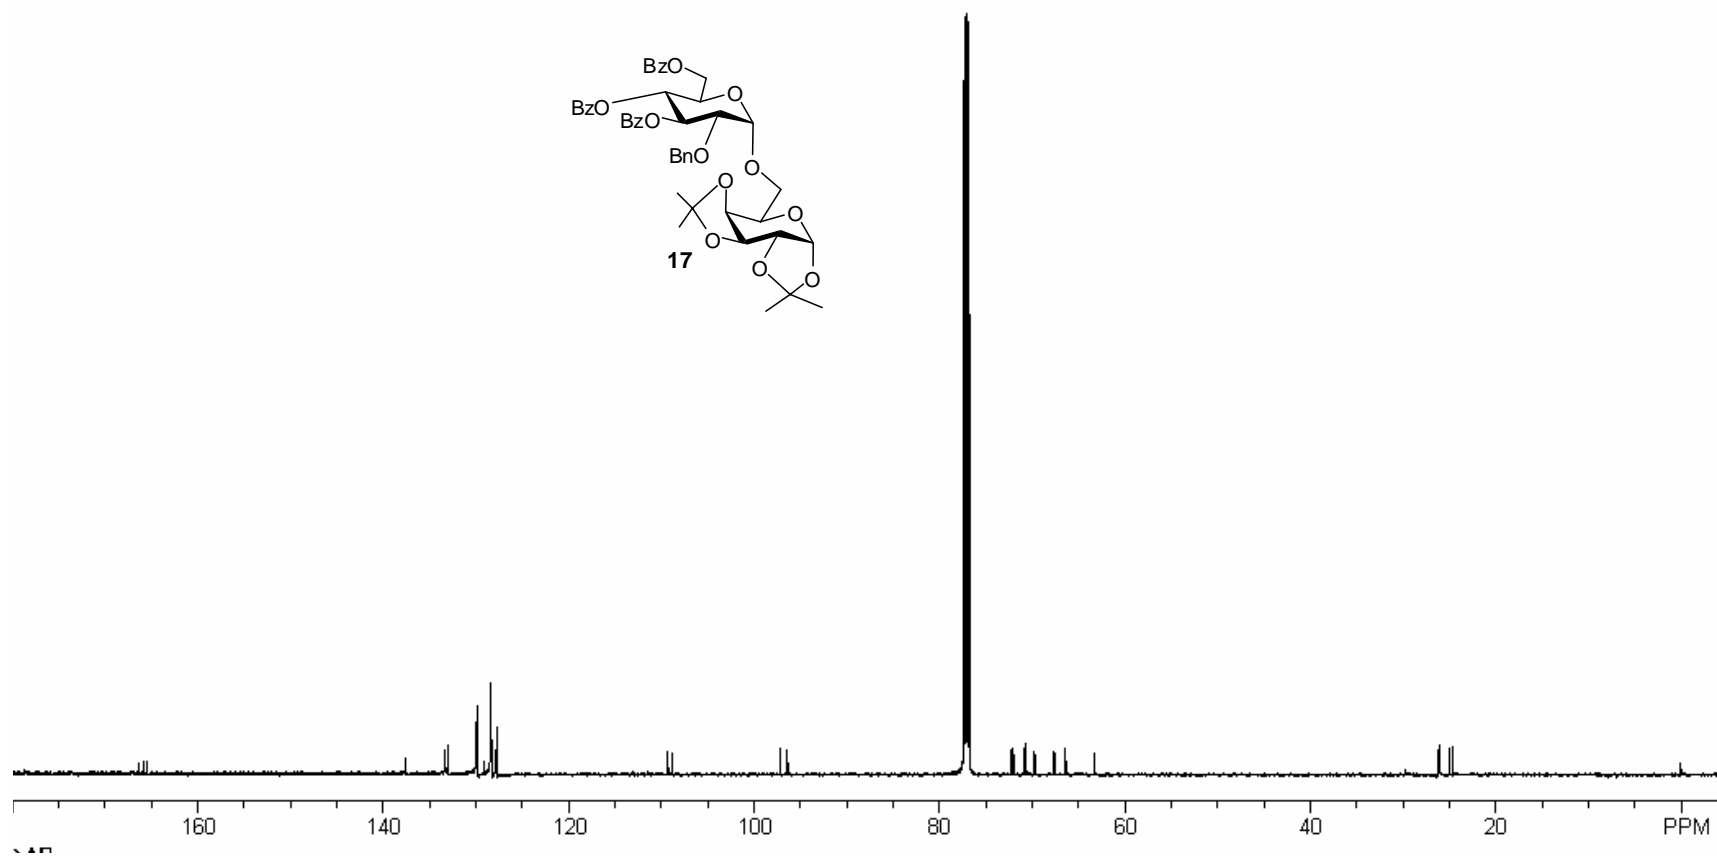

## UV Spectra of Compound **11**, **13** and **14** in Ethanol

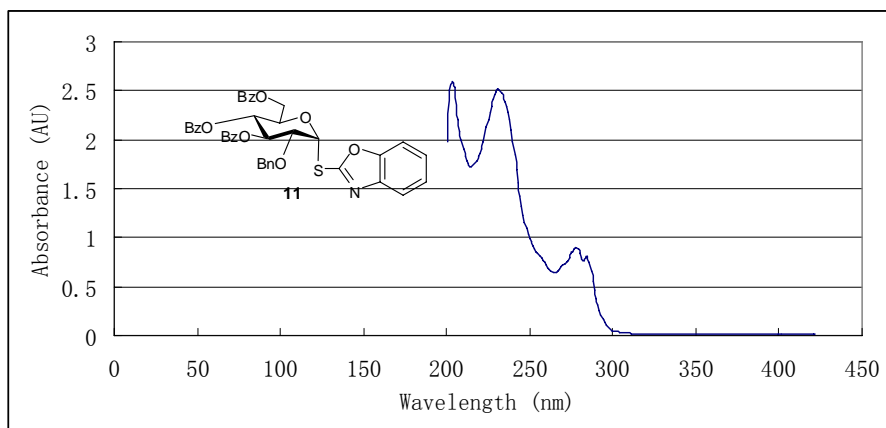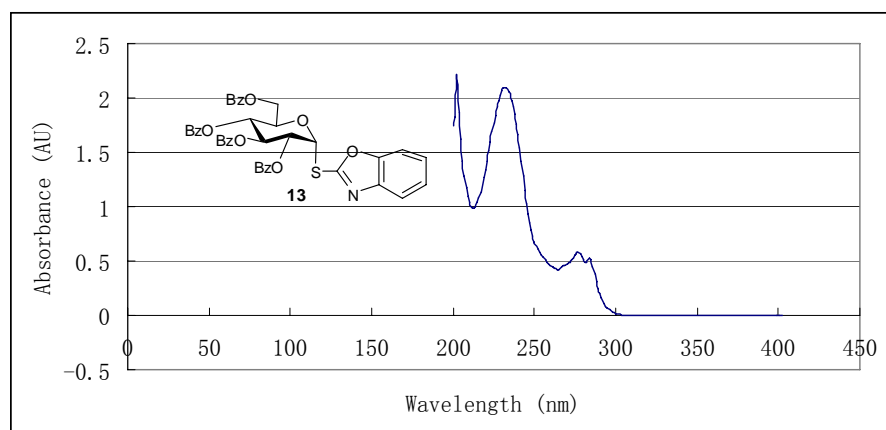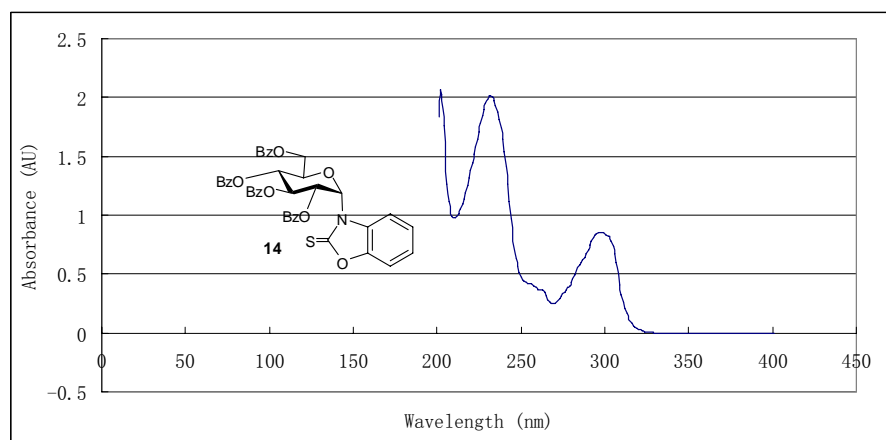

Supplement: NIHMS335607-supplement-supporting_information.pdf [file NIHMS335607-supplement-supporting_information.pdf]
